# Supplementary material for: Echinochrome A Inhibits Melanogenesis in B16F10 Cells by Downregulating CREB Signaling
Source: MDPI journal article supplement (doi:10.3390/md20090555), 2022-08-29
Supplement: s1 [file s1]

**Table S1.** Inhibitory effects of arbutin on the activity of tyrosinase and oxidation of L-DOPA.

| Arbutin<br>( $\mu\text{M}$ ) | Inhibition rate of tyrosinase activity<br>(%) | Inhibition rate of L-DOPA oxidation<br>(%) |
|------------------------------|-----------------------------------------------|--------------------------------------------|
| 0                            | 0                                             | 0                                          |
| 72                           | $44.25 \pm 2.39$                              | -                                          |
| 360                          | $74.81 \pm 7.54$                              | -                                          |
| 720                          | $70.74 \pm 4.76$                              | -                                          |
| 900                          | $73.88 \pm 5.39$                              | $46.28 \pm 0.40$                           |
| 1,835                        | $83.57 \pm 6.74$                              | $50.80 \pm 4.11$                           |
| 3,670                        | - <sup>a</sup>                                | $63.01 \pm 6.81$                           |
| 7,340                        | -                                             | $73.34 \pm 5.36$                           |
| 11,010                       | -                                             | $73.21 \pm 1.77$                           |
| 14,680                       | -                                             | $88.22 \pm 2.25$                           |

<sup>a</sup>: No measurement.  $\text{IC}_{50}$  concentration of arbutin to inhibit tyrosinase activity:  $126 \pm 23.11 \mu\text{M}$ .  $\text{IC}_{50}$  concentration of arbutin to inhibit L-DOPA oxidation:  $3,279.74 \pm 17.14 \mu\text{M}$ .
